# Supplementary material for: Metabolic Effects of Krill Oil are Essentially Similar to Those of Fish Oil but at Lower Dose of EPA and DHA, in Healthy Volunteers
Source: PubMed Central journal article supplement — Lipids. 2010 Nov 2;46(1):37–46. doi: 10.1007/s11745-010-3490-4 (PMC3024511; doi:10.1007/s11745-010-3490-4), 2010-11-02
Supplement: 11745_2010_3490_MOESM1_ESM.pdf [file 11745_2010_3490_MOESM1_ESM.pdf]

## Supplementary tables

**Table 6.**  $\alpha$ -tocopherol, hsCRP and F2-Isoprostane.

| Parameter                                   | Treatment | N  | Baseline         | End of study     | Change            | *<br>p-value<br>for change | **<br>p-value<br>between<br>groups |
|---------------------------------------------|-----------|----|------------------|------------------|-------------------|----------------------------|------------------------------------|
| $\alpha$ -tocopherol<br>( $\mu$ M)          | Fish oil  | 40 | 36.2 $\pm$ 12.65 | 33.2 $\pm$ 7.03  | -3.0 $\pm$ 13.18  | 0.16                       |                                    |
|                                             | Krill oil | 38 | 40.0 $\pm$ 22.78 | 32.8 $\pm$ 14.37 | -7.2 $\pm$ 23.22  | 0.063                      | 0.96                               |
|                                             | Control   | 37 | 36.8 $\pm$ 16.84 | 32.2 $\pm$ 8.76  | -4.6 $\pm$ 17.79  | 0.13                       |                                    |
| hsCRP (mg/L)                                | Fish oil  | 40 | 1.28 $\pm$ 1.448 | 1.56 $\pm$ 1.769 | 0.28 $\pm$ 1.619  | 0.28                       |                                    |
|                                             | Krill oil | 38 | 1.46 $\pm$ 1.954 | 1.29 $\pm$ 1.811 | -0.17 $\pm$ 1.967 | 0.61                       | 0.83                               |
|                                             | Control   | 37 | 1.79 $\pm$ 2.266 | 1.62 $\pm$ 1.752 | -0.18 $\pm$ 2.499 | 0.67                       |                                    |
| F2-Isoprostane<br>(nmol/mmol<br>creatinine) | Fish oil  | 40 | 0.38 $\pm$ 0.26  | 0.41 $\pm$ 0.25  | 0.03 $\pm$ 0.19   | 0.34                       |                                    |
|                                             | Krill oil | 38 | 0.44 $\pm$ 0.27  | 0.43 $\pm$ 0.33  | -0.02 $\pm$ 0.17  | 0.57                       | 0.43                               |
|                                             | Control   | 37 | 0.43 $\pm$ 0.25  | 0.42 $\pm$ 0.24  | -0.02 $\pm$ 0.19  | 0.56                       |                                    |

\*Test of within-group changes. \*\*Test comparing change from start to end of intervention between the fish oil, krill oil group and the control groups.
